# Supplementary material for: Deliberate design of a neutral heterometallic organic framework containing a record 25-fold interpenetrating diamondoid network
Source: Royal Society of Chemistry journal article supplement (doi:10.1039/c2ce25605c), 2012-01-01
Supplement: c2ce25605c.pdf [file c2ce25605c.pdf]

## Supporting Information

# **Deliberate Design of a Neutral Heterometallic Organic Framework containing a Record 25-Fold Interpenetrating Diamondoid Network**

*Yan-Ping He, Yan-Xi Tan, Jian Zhang\**

State Key Laboratory of Structural Chemistry, Fujian Institute of Research on the  
Structure of Matter, the Chinese Academy of Sciences, Fuzhou, Fujian 350002, P. R.

China. E-mail: [zhj@fjirsm.ac.cn](mailto:zhj@fjirsm.ac.cn).

**Materials and Methods:** All chemicals were commercially purchased and used without further purification. The powder X-ray diffraction (PXRD) analyses were recorded on a Rigaku Dmax2500 diffractometer with Cu K $\alpha$  radiation ( $\lambda = 1.54056 \text{ \AA}$ ) with a step size of  $0.05^\circ$ . Thermal stability studies were carried out on a NETSCHZ STA-449C thermoanalyzer with a heating rate of  $10^\circ\text{C}/\text{min}$  under an air atmosphere.

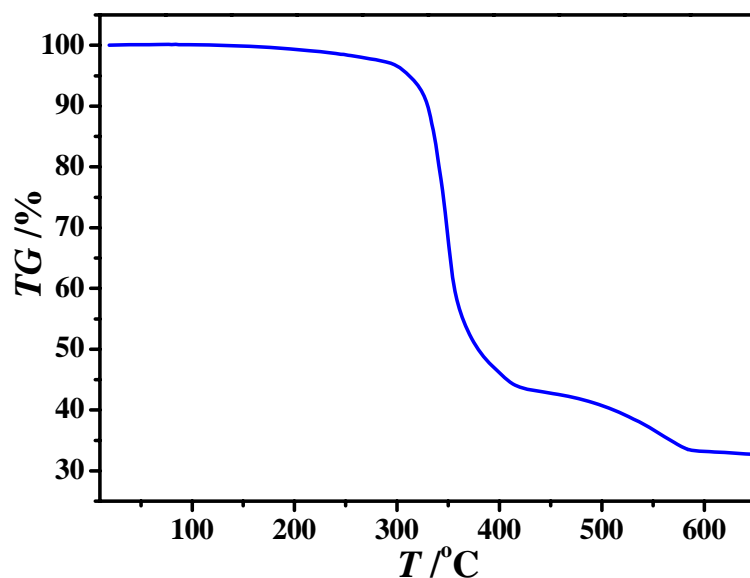

*Figure S1.* The TGA curve of **1**.

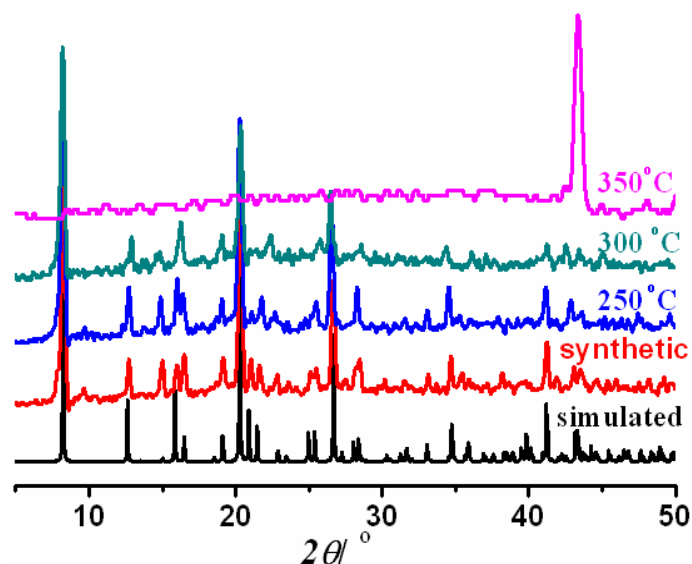

*Figure S2.* XRPD patterns of simulated from the single-crystal data of **1** (black); as-synthesized **1** (red); activated at 250 °C (blue), activated at 300 °C (olive) and activated at 300 °C (pink).

TOPOS analysis results:

#####

1:C H Cd Cu N O

#####

Topology for Cd1

-----

Atom Cd1 links by bridge ligands and has

| Common vertex with |         |         |         |          | R(A-A)  | f |
|--------------------|---------|---------|---------|----------|---------|---|
| Cd 1               | -1.0000 | -0.2500 | -1.1250 | (-1 0-1) | 26.467Å | 1 |
| Cd 1               | 1.0000  | 0.7500  | -1.1250 | ( 1 1-1) | 26.467Å | 1 |
| Cd 1               | 0.5000  | -0.7500 | 1.3750  | ( 0-1 1) | 26.467Å | 1 |
| Cd 1               | -0.5000 | 1.2500  | 1.3750  | (-1 1 1) | 26.467Å | 1 |

-----

Structural group analysis

-----

-----

Structural group No 1

-----

Structure consists of 3D framework with CdCu<sub>2</sub>O<sub>8</sub>C<sub>52</sub>H<sub>32</sub>

There are 25 interpenetrating nets

PIV: Partial interpenetration vectors

-----

- [0,0,1] (13.20Å) (5 nets [1,2,3,4,5])
- [1/2,1/2,1/2] (14.66Å) (5 nets [1,6,7,8,9])
- [1/2,1/2,-1/2] (14.66Å) (5 nets [1,10,11,12,13])
- [1/2,-1/2,1/2] (14.66Å) (5 nets [1,14,15,16,17])
- [1/2,-1/2,-1/2] (14.66Å) (5 nets [1,18,19,20,21])
- [0,1,0] (18.51Å) (5 nets [1,22,23,24,25])

-----

PIC: [0,0,5][5/2,5/2,5/2][2,1,0] (PICVR=25)

Zt=25(5\*5); Zn=1

Class Ib Z=25(5\*5)

Coordination sequences

-----

Cd1: 1 2 3 4 5 6 7 8 9 10

Num 4 12 24 42 64 92 124 162 204 252

Cum 5 17 41 83 147 239 363 525 729 981

-----

TD10=981

Vertex symbols for selected sublattice

-----

Cd1 Schlafli symbol: {6^6}

With circuits:[6(2).6(2).6(2).6(2).6(2).6(2)]

-----

Total Schlafli symbol: {6^6}

4-c net; uninodal net

Topological type: dia Diamond; 4/6/c1; sqc6 {6^6} - VS [6(2).6(2).6(2).6(2).6(2).6(2)]  
(66853 types in 9 databases)
